# Supplementary material
Source: publisher site journal article supplement (https://www.dovepress.com/get_supplementary_file.php?f=437257.docx)
Supplement: Supplementary file 1 [file get_supplementary_file.php]

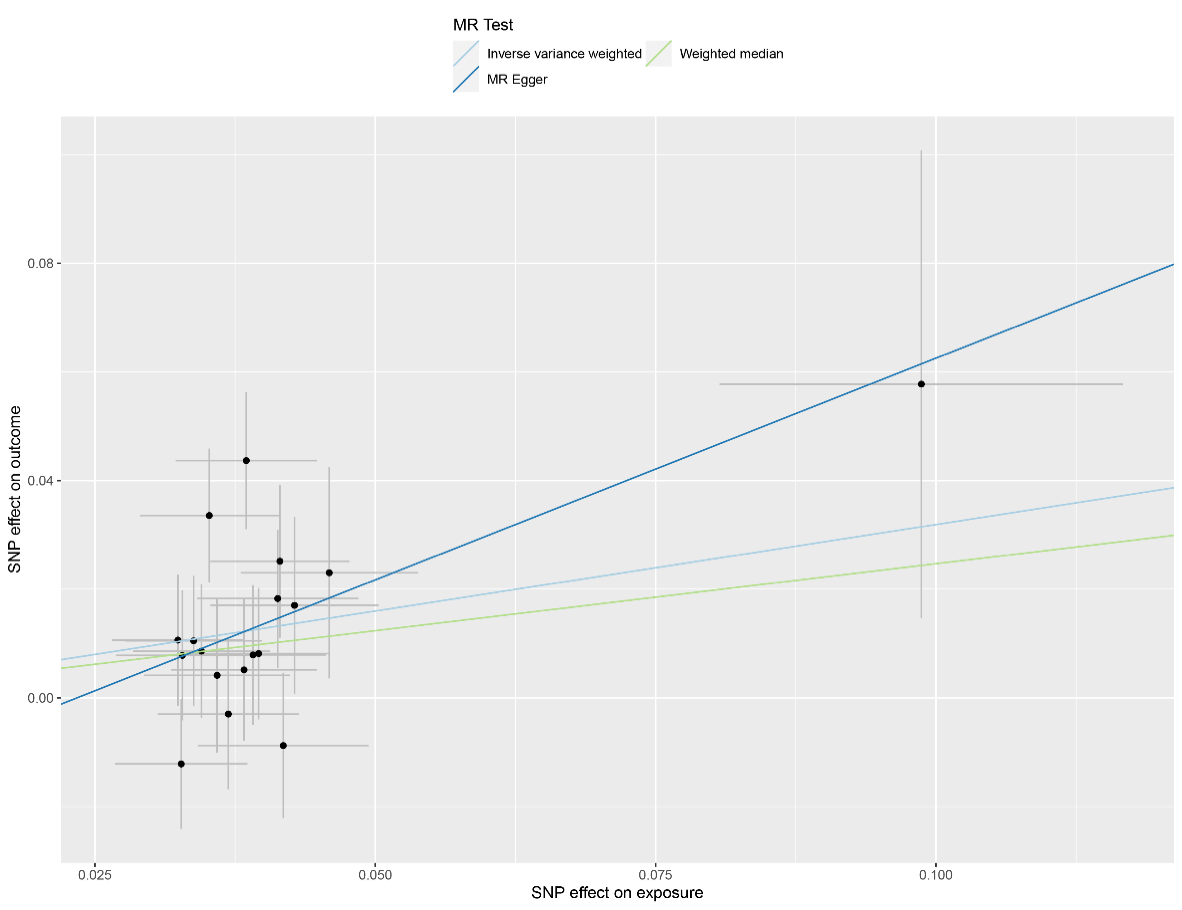


Figure S1A Scatter plot of the causal effect of GERD on COPD using different MR methods.

MR, mendelian randomization; SNP, single-nucleotide polymorphism


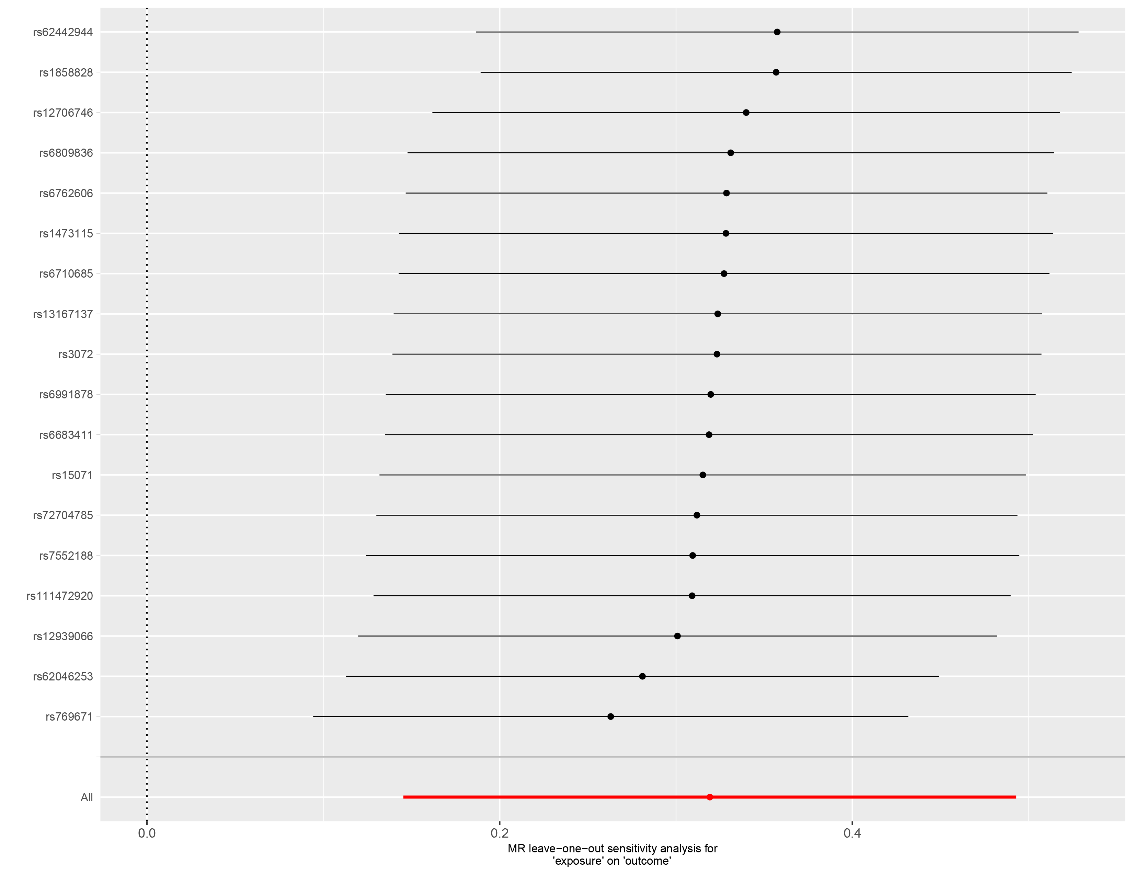


Figure S1B Leave-one-SNP-out of SNPs associated with GERD and their risk of COPD.

MR, mendelian randomization; SNP, single-nucleotide polymorphism

**
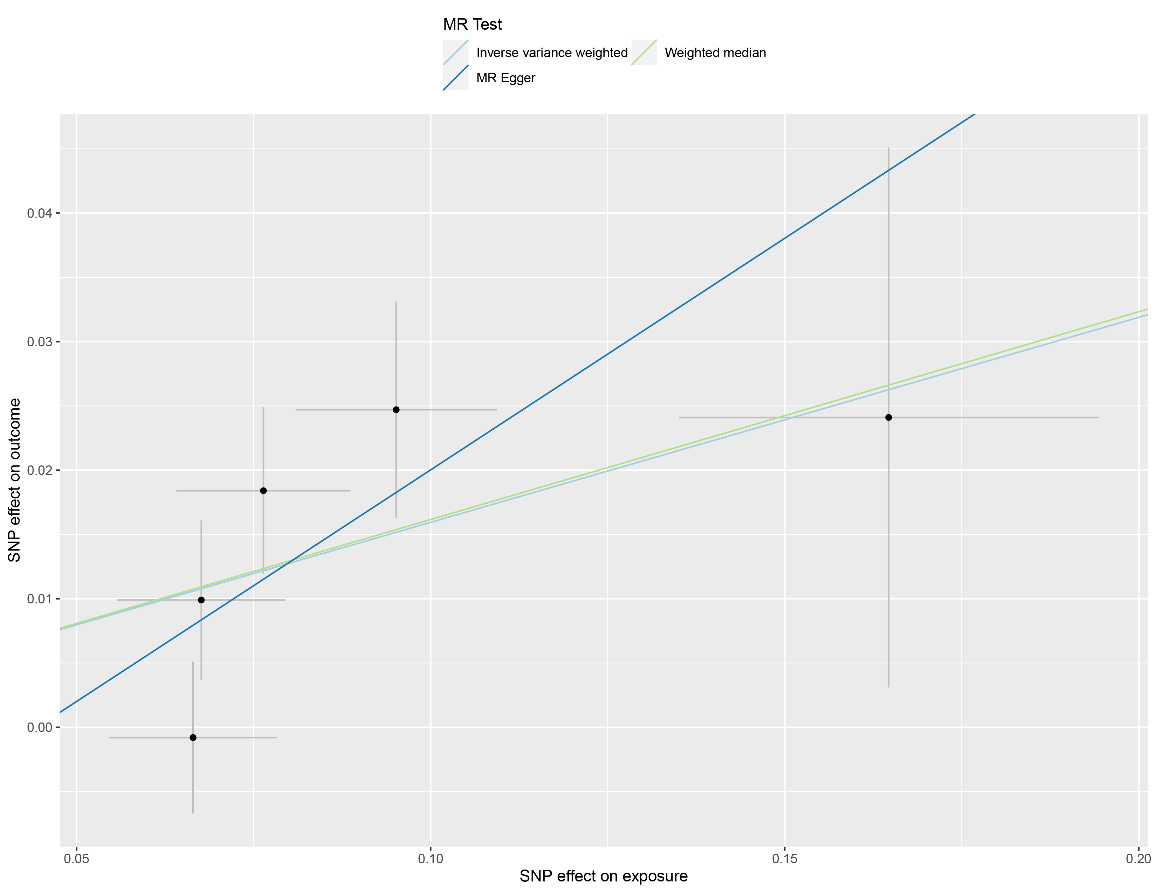
**

Figure S2A Scatter plot of the causal effect of COPD on GERD using different MR methods.

MR, mendelian randomization; SNP, single-nucleotide polymorphism

**
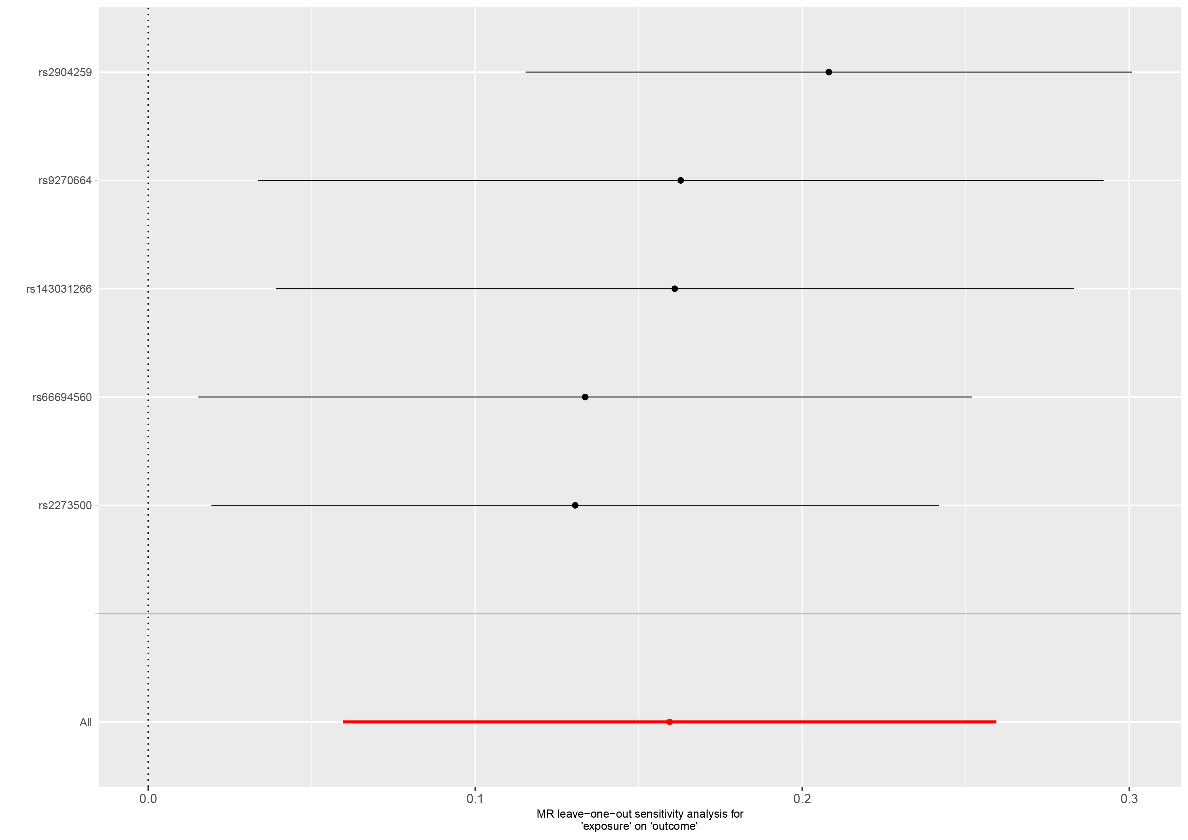
**

Figure S2B Leave-one-SNP-out of SNPs associated with COPD and their risk of GERD.

MR, mendelian randomization; SNP, single-nucleotide polymorphism
